# Supplementary material for: Mental Health Service Use by Persons of Asian Ancestry With DSM-IV Mental Disorders in the United States
Source: Atypon-hosted journal article supplement (doi:10.1176/ps.62.10.pss6210_1180), 2011-10-01
Supplement: Lee_ds.pdf [file Lee_ds.pdf]

**SUPPLEMENTAL DATA**

SuppT1. 12-month prevalence of mental health utilization by racial/ethnic subgroup by disorder

| Mental health utilization       | Asian<br>(n=1,332) |     |      | White<br>(n=24,507) |      |      | Black<br>(n=8,245) |      |      | Hispanic<br>(n=8,308) |      |      | Native American<br>(n=701) |     |      | P-value |
|---------------------------------|--------------------|-----|------|---------------------|------|------|--------------------|------|------|-----------------------|------|------|----------------------------|-----|------|---------|
|                                 | N1                 | N2  | W%   | N1                  | N2   | W%   | N1                 | N2   | W%   | N1                    | N2   | W%   | N1                         | N2  | W%   |         |
| Mood disorders                  |                    |     |      |                     |      |      |                    |      |      |                       |      |      |                            |     |      |         |
| Major depression                | 27                 | 66  | 39.9 | 1048                | 1891 | 55.2 | 224                | 510  | 42.8 | 286                   | 561  | 45.0 | 48                         | 91  | 53.1 | .001    |
| Dysthymia                       | 5                  | 14  | 38.8 | 329                 | 496  | 66.8 | 82                 | 150  | 48.8 | 102                   | 158  | 57.3 | 17                         | 25  | 69.4 | .036    |
| Bipolar disorder (I/II)         | 7                  | 27  | 16.0 | 288                 | 677  | 41.2 | 69                 | 239  | 27.4 | 83                    | 225  | 29.4 | 20                         | 36  | 47.6 | .001    |
| Any mood disorder               | 33                 | 96  | 32.3 | 1207                | 2392 | 49.9 | 269                | 707  | 36.1 | 350                   | 756  | 39.7 | 58                         | 114 | 48.9 | <.001   |
| Anxiety disorder                |                    |     |      |                     |      |      |                    |      |      |                       |      |      |                            |     |      |         |
| Social Phobia                   | 10                 | 27  | 27.9 | 203                 | 745  | 25.7 | 33                 | 165  | 18.9 | 39                    | 173  | 20.0 | 8                          | 30  | 22.8 | .587    |
| GAD                             | 7                  | 14  | 51.0 | 262                 | 564  | 46.4 | 56                 | 143  | 34.3 | 60                    | 152  | 38.3 | 10                         | 21  | 42.3 | .307    |
| Agoraph./panic disorder         | 6                  | 11  | 71.7 | 388                 | 594  | 63.3 | 71                 | 135  | 51.0 | 87                    | 157  | 50.8 | 18                         | 32  | 59.2 | .136    |
| Specific phobia                 | 5                  | 61  | 7.7  | 282                 | 1841 | 14.7 | 54                 | 610  | 7.5  | 63                    | 502  | 10.8 | 13                         | 59  | 20.3 | .009    |
| Any Anxiety disorder            | 20                 | 96  | 22.1 | 668                 | 2901 | 22.0 | 139                | 872  | 14.7 | 155                   | 783  | 18.6 | 32                         | 108 | 30.5 | .010    |
| Substance use disorder          |                    |     |      |                     |      |      |                    |      |      |                       |      |      |                            |     |      |         |
| Alcohol disorder                | 0                  | 44  | 0    | 6                   | 1517 | 0.5  | 6                  | 354  | 1.7  | 1                     | 438  | 0.6  | 1                          | 43  | 2.5  | .193    |
| Drug disorder                   | 1                  | 14  | 7.1  | 22                  | 393  | 6.1  | 6                  | 112  | 6.8  | 5                     | 103  | 5.3  | 1                          | 26  | 2.6  | .945    |
| Any DSM-IV psychiatric disorder | 51                 | 259 | 21.0 | 1917                | 7514 | 24.0 | 452                | 2177 | 20.2 | 515                   | 1959 | 22.5 | 91                         | 290 | 30.4 | .034    |

Prevalence is written in the form of number of people who utilized the service (N1) over number of people in the specific racial/ethnic group with the diagnosis of specific mental disorder (N2). Weighted proportion (W%) is different from simply dividing the number of people within ethnic group who utilized mental health services by the number of people with diagnosis.

SuppT2. Odds ratio of 12-month mental health service utilization between Asian, whites, blacks, and Hispanics with a 12-month prevalence of DSM-IV mood, anxiety, and disorder diagnosis

|                            | Mood d/o MHS utilization |          | Anxiety d/o MHS utilization |                  | Substance use d/o MHS utilization |          | Any mental health service utilization |          |
|----------------------------|--------------------------|----------|-----------------------------|------------------|-----------------------------------|----------|---------------------------------------|----------|
|                            | OR                       | 95%CI    | OR                          | 95%CI            | OR                                | 95%CI    | OR                                    | 95%CI    |
| Asian vs. white            | .64                      | .41-1.02 | 1.43                        | .81-2.53         | .78                               | .22-2.84 | .94                                   | .61-1.46 |
| Asian v. Black             | 1.00                     | .63-1.58 | <b>2.05</b>                 | <b>1.03-4.07</b> | .73                               | .20-2.65 | 1.15                                  | .74-1.78 |
| Asian vs. Hispanic         | .81                      | .52-1.24 | 1.46                        | .70-3.04         | .69                               | .16-3.09 | .97                                   | .65-1.46 |
| Asian vs. Native Americans | .61                      | .36-1.05 | 1.09                        | .46-2.56         | .72                               | .16-3.20 | .92                                   | .54-1.57 |

Odds ratio controlled for age, sex, education, family income, marital status, current insurance status, and \*disorder severity indicator. \*Mood (number of mood disorder symptoms), anxiety (number of anxiety disorder symptoms), alcohol (number of alcohol disorder symptoms), and drug (number of drug disorder symptoms).
